# Supplementary material
Source: Springer Nature journal article supplement (https://www.springermedizin.de/resource/supplementary/12889_2012_5132_MOESM2_ESM.pdf/9493392)

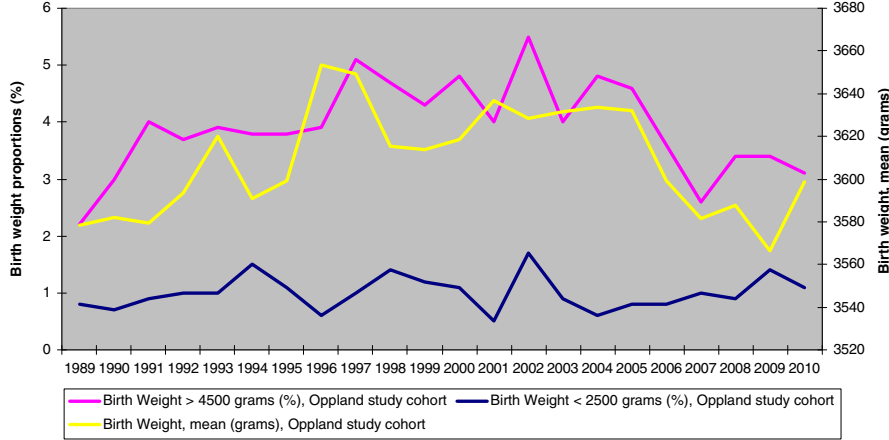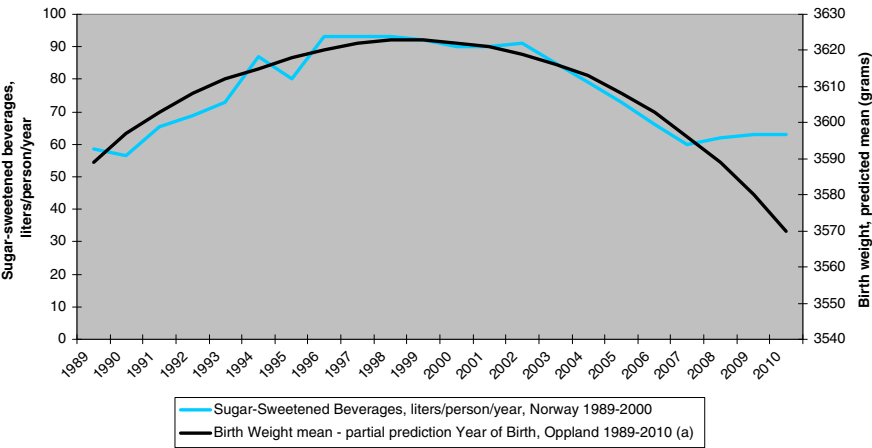

Supplement: MOESM2 [file 9493392]
